# Supplementary material for: Mycotoxin Exposure and Renal Cell Carcinoma Risk: An Association Study in the EPIC European Cohort
Source: MDPI journal article supplement (doi:10.3390/nu14173581), 2022-08-30
Supplement: s1 [file s1]

**Table S1.** Description of the external mycotoxin exposures assessed based upon dietary questionnaire data for the EPIC cohort. (Table S1: lower bound values) (Table 2: middle bound values, can be found in the article)

| Table S1 Lower Bound (LB) - $\mu\text{g/kg}$ body weight per day         |             |      |      |      |      |      |      |      |      |      |
|--------------------------------------------------------------------------|-------------|------|------|------|------|------|------|------|------|------|
| LABEL (expressed in $\mu\text{g/kg}$ body weight/d)                      | Case status | Mean | Std  | Min  | P05  | P25  | P50  | P75  | P95  | Max  |
| Ergot alkaloids<br>(Lower bound - body weight - computed)                | Non-case    | 0.02 | 0.03 | 0.00 | 0.00 | 0.00 | 0.01 | 0.02 | 0.07 | 1.57 |
|                                                                          | RCC case    | 0.02 | 0.03 | 0.00 | 0.00 | 0.00 | 0.01 | 0.02 | 0.08 | 0.36 |
| Ochratoxins<br>(Lower bound - body weight - computed)                    | Non-case    | 0.00 | 0.00 | 0.00 | 0.00 | 0.00 | 0.00 | 0.00 | 0.00 | 0.05 |
|                                                                          | RCC case    | 0.00 | 0.00 | 0.00 | 0.00 | 0.00 | 0.00 | 0.00 | 0.00 | 0.01 |
| Aflatoxins<br>(Lower bound - body weight - computed)                     | Non-case    | 0.00 | 0.00 | 0.00 | 0.00 | 0.00 | 0.00 | 0.00 | 0.00 | 0.01 |
|                                                                          | RCC case    | 0.00 | 0.00 | 0.00 | 0.00 | 0.00 | 0.00 | 0.00 | 0.00 | 0.00 |
| Patulin<br>(Lower bound - body weight)                                   | Non-case    | 0.00 | 0.01 | 0.00 | 0.00 | 0.00 | 0.00 | 0.00 | 0.01 | 0.21 |
|                                                                          | RCC case    | 0.00 | 0.01 | 0.00 | 0.00 | 0.00 | 0.00 | 0.00 | 0.01 | 0.08 |
| Deoxynivalenol and derivatives<br>(Lower bound - body weight - computed) | Non-case    | 0.08 | 0.07 | 0.00 | 0.01 | 0.02 | 0.06 | 0.10 | 0.21 | 1.35 |
|                                                                          | RCC case    | 0.07 | 0.06 | 0.00 | 0.01 | 0.02 | 0.05 | 0.10 | 0.18 | 0.40 |
| T-2/HT-2 toxins<br>(Lower bound - body weight - computed)                | Non-case    | 0.00 | 0.00 | 0.00 | 0.00 | 0.00 | 0.00 | 0.00 | 0.00 | 0.17 |
|                                                                          | RCC case    | 0.00 | 0.00 | 0.00 | 0.00 | 0.00 | 0.00 | 0.00 | 0.01 | 0.03 |
| Nivalenol<br>(Lower bound - body weight)                                 | Non-case    | 0.00 | 0.00 | 0.00 | 0.00 | 0.00 | 0.00 | 0.00 | 0.00 | 0.01 |
|                                                                          | RCC case    | 0.00 | 0.00 | 0.00 | 0.00 | 0.00 | 0.00 | 0.00 | 0.00 | 0.00 |
| Fumonisin<br>(Lower bound - body weight - computed)                      | Non-case    | 0.05 | 0.06 | 0.00 | 0.00 | 0.02 | 0.03 | 0.06 | 0.13 | 2.42 |
|                                                                          | RCC case    | 0.05 | 0.08 | 0.00 | 0.00 | 0.01 | 0.03 | 0.05 | 0.13 | 1.18 |
| Diacetoxyscirpenol<br>(Lower bound - body weight)                        | Non-case    | 0.00 | 0.00 | 0.00 | 0.00 | 0.00 | 0.00 | 0.00 | 0.00 | 0.00 |
|                                                                          | RCC case    | 0.00 | 0.00 | 0.00 | 0.00 | 0.00 | 0.00 | 0.00 | 0.00 | 0.00 |
| Zearalenone & derivatives<br>(Lower bound - body weight - computed)      | Non-case    | 0.01 | 0.02 | 0.00 | 0.00 | 0.00 | 0.01 | 0.01 | 0.04 | 0.69 |
|                                                                          | RCC case    | 0.01 | 0.02 | 0.00 | 0.00 | 0.00 | 0.01 | 0.01 | 0.05 | 0.40 |
|                                                                          | Non-case    | 0.14 | 0.10 | 0.00 | 0.04 | 0.07 | 0.11 | 0.17 | 0.32 | 2.53 |

|                                                                    |          |      |      |      |      |      |      |      |      |      |
|--------------------------------------------------------------------|----------|------|------|------|------|------|------|------|------|------|
| <b>Fusarium Toxins</b><br>(Lower bound - body weight - computed)   | RCC case | 0.13 | 0.10 | 0.01 | 0.03 | 0.07 | 0.11 | 0.16 | 0.31 | 1.33 |
| Fusarenon X<br>(Lower bound - body weight)                         | Non-case | 0.00 | 0.00 | 0.00 | 0.00 | 0.00 | 0.00 | 0.00 | 0.00 | 0.00 |
|                                                                    | RCC case | 0.00 | 0.00 | 0.00 | 0.00 | 0.00 | 0.00 | 0.00 | 0.00 | 0.00 |
| Sterigmatocystins<br>(Lower bound - body weight)                   | Non-case | 0.00 | 0.00 | 0.00 | 0.00 | 0.00 | 0.00 | 0.00 | 0.00 | 0.00 |
|                                                                    | RCC case | 0.00 | 0.00 | 0.00 | 0.00 | 0.00 | 0.00 | 0.00 | 0.00 | 0.00 |
| Moniliformine<br>(Lower bound - body weight)                       | Non-case | 0.00 | 0.01 | 0.00 | 0.00 | 0.00 | 0.00 | 0.00 | 0.01 | 0.44 |
|                                                                    | RCC case | 0.00 | 0.01 | 0.00 | 0.00 | 0.00 | 0.00 | 0.00 | 0.01 | 0.09 |
| <b>Alternaria toxins</b><br>(Lower bound - body weight - computed) | Non-case | 0.01 | 0.01 | 0.00 | 0.00 | 0.00 | 0.00 | 0.01 | 0.02 | 0.40 |
|                                                                    | RCC case | 0.01 | 0.01 | 0.00 | 0.00 | 0.00 | 0.00 | 0.01 | 0.03 | 0.11 |
| Citrinin<br>(Lower bound - body weight)                            | Non-case | 0.00 | 0.00 | 0.00 | 0.00 | 0.00 | 0.00 | 0.00 | 0.00 | 0.00 |
|                                                                    | RCC case | 0.00 | 0.00 | 0.00 | 0.00 | 0.00 | 0.00 | 0.00 | 0.00 | 0.00 |
| Beauvericin<br>(Lower bound - body weight)                         | Non-case | 0.00 | 0.00 | 0.00 | 0.00 | 0.00 | 0.00 | 0.00 | 0.00 | 0.00 |
|                                                                    | RCC case | 0.00 | 0.00 | 0.00 | 0.00 | 0.00 | 0.00 | 0.00 | 0.00 | 0.00 |
| Enniatins<br>(Lower bound - body weight - computed)                | Non-case | 0.05 | 0.05 | 0.00 | 0.00 | 0.01 | 0.03 | 0.06 | 0.15 | 0.96 |
|                                                                    | RCC case | 0.05 | 0.05 | 0.00 | 0.00 | 0.01 | 0.03 | 0.07 | 0.14 | 0.37 |
| <b>Total mycotoxins</b><br>(Lower bound - body weight - computed)  | Non-case | 0.21 | 0.14 | 0.00 | 0.06 | 0.11 | 0.18 | 0.27 | 0.48 | 3.11 |
|                                                                    | RCC case | 0.21 | 0.15 | 0.01 | 0.05 | 0.11 | 0.17 | 0.26 | 0.46 | 1.72 |

Abbreviations: European Prospective Investigation into Cancer and Nutrition (EPIC), Lower Bound (LB), Middle Bound (MB), Renal Cell Carcinoma (RCC). The variables in bold show that a large part of the EPIC population is exposed to some of the main mycotoxins present in European foods such as *DON and derivatives*, *fumonisin*s, *Fusarium* toxins, *Alternaria* toxins and total mycotoxins.

**Table S2.** Percentage (%) of the EPIC population with external mycotoxin exposures assessed based upon dietary questionnaire data below and above the safety reference values set by EFSA.

| N = 450,112                            | Type  | Cut-off | Reference | Lower Bound |        |             |       | Middle Bound |        |             |       |
|----------------------------------------|-------|---------|-----------|-------------|--------|-------------|-------|--------------|--------|-------------|-------|
| LABEL (expressed in µg/kg body weight) |       |         |           | N ≤ cut-off | %      | N > cut-off | %     | N ≤ cut-off  | %      | N > cut-off | %     |
| Ergot alkaloids                        | TDI   | 0.6     | [67]      | 450,103     | 99.998 | 9           | 0.002 | 450,012      | 99.978 | 100         | 0.022 |
|                                        | ARfD  | 1       |           | 450,112     | 100    | .           | .     | 450,108      | 99.999 | 4           | 0.001 |
| Ochratoxins sum                        | TDI   | 0.01714 | [37]      | 450,025     | 99.981 | 87          | 0.019 | 449,985      | 99.972 | 127         | 0.028 |
| Aflatoxin sum                          | BMDL  | 0.4     | [68]      | 450,112     | 100    | .           | .     | 450,112      | 100    | .           | .     |
| Patulin                                | PMTDI | 0.4     | [69]      | 450,112     | 100    | .           | .     | 450,112      | 100    | .           | .     |
| Deoxynivalenol and derivatives         | PMTDI | 1       | [70]      | 450,101     | 99.998 | 11          | 0.002 | 449,786      | 99.928 | 326         | 0.072 |
| T-2/HT-2 toxins sum                    | TDI   | 0.1     | [71]      | 450,112     | 100    | .           | .     | 450,103      | 99.998 | 9           | 0.002 |
| Fumonisin sum                          | PMTDI | 2       | [70]      | 450,109     | 99.999 | 3           | 0.001 | 450,109      | 99.999 | 3           | 0.001 |
| Zearalenone and derivatives sum        | TDI   | 0.25    | [72]      | 449,926     | 99.959 | 186         | 0.041 | 449,761      | 99.922 | 351         | 0.078 |

Abbreviations: Acute Reference Dose (ARfD), BenchMark Dose (BMD), Lower confidence bound of BMD (BMDL), European Food Safety Authority (EFSA), European Prospective Investigation into Cancer and Nutrition (EPIC), Lower Bound (LB), Middle Bound (MB), Provisional Maximum Tolerable Daily Intake (PMTDI), Tolerable Daily Intake (TDI)
